# Supplementary material for: A Functional Role of S100A4/Non-Muscle Myosin IIA Axis for Pro-Tumorigenic Vascular Functions in Glioblastoma
Source: Research Square preprint supplement (doi:10.21203/rs.3.rs-1160637/v1), 2021-12-20
Supplement: Supplementary file 1 [file 7ed44de9343e94764336b8e7.xlsx]

## Sheet: Sheet1
	Table 2. Univariate analyses for overall survival and progression-free survival in GBM
		Univariate analysis
	Variable	Cut-off	Log rank c2	P-value	unfavorable factor
	Overall survival
	S100A4	7/8	16.6	<0.0001	High score
	NM IIA	5/6	1.7	0.2
	Nestin	7/8	0.02	0.9
	CA9	7/8	1.9	0.2
	HIF-1a	7/8	0.6	0.4
	Gender	M/F	1.1	0.3
	Age	58/59	0.06	0.8
	Progression-free survival
	S100A4	7/8	5.1	0.02	High score
	NM IIA	5/6	2.6	0.1
	Nestin	7/8	0.008	0.9
	CA9	7/8	0.03	0.8
	HIF-1a	7/8	0.02	0.9
	Gender	M/F	0.3	0.6
	Age	58/59	1.7	0.2
	IHC scores are divided into two categories (high and low) based on the cut-off values (mean scores)
